# Supplementary material for: Optogenetic modulation of guanine nucleotide exchange factors of Ras superfamily proteins directly controls cell shape and movement
Source: Frontiers journal article supplement (doi:10.3389/fcell.2023.1195806), 2023-07-10
Supplement: Data_Sheet_1.PDF [file Data_Sheet_1.PDF]

# 1 **Materials and Equipment**

## 2 **Cell Culture Reagents**

### 3 **(A) HL-60 cells**

- 4 Human neutrophil-like HL-60 cell line (acquired from Orion Weiner Lab at UCSF)
- 5 10 cm cell culture dish (Greiner Bio-One #664160)
- 6 Heat-killed *Klebsiella aerogenes* (DictyBase)
- 7 Heat-inactivated fetal bovine serum (FBS; Thermo Fisher Scientific #16140071)
- 8 Penicillin-streptomycin solution (Pen-Strep; Thermo Fisher Scientific #15140122)
- 9 RPMI medium 1640 (Gibco #22400-089) supplemented with 15% FBS and 1% Pen-Strep

### 10 **(B) Dictyostelium**

- 11 *Dictyostelium discoideum* AX2 strain (DictyBase stock).
- 12 Heat-killed *Klebsiella aerogenes* (DictyBase stock).
- 13 Doxycycline hyclate (Sigma #D9891)
- 14 10 cm cell culture dish
- 15 HL5 axenic medium: Recipe was obtained from DictyBase (<http://dictybase.org>). Briefly, 5g proteose peptone, 5g thiotone E peptone, 10 g glucose, 5 g yeast extract, 0.35 g Na<sub>2</sub>HPO<sub>4</sub>\*7H<sub>2</sub>O, 0.35 g KH<sub>2</sub>PO<sub>4</sub>, and 0.05 g dihydrostreptomycin-sulfate (GoldBio, #S-150-100) were added to distilled water and the volume was brought to 1 liter. pH was adjusted with HCl to pH 6.4-6.7. Finally, medium was autoclaved for 20 mins to sterilize.
- 20 Development buffer (DB): Recipe was obtained from DictyBase. Briefly, 5 mM Na<sub>2</sub>HPO<sub>4</sub>, 5 mM KH<sub>2</sub>PO<sub>4</sub>, 1 mM CaCl<sub>2</sub>, and 2 mM MgCl<sub>2</sub> were added to distilled water. pH was adjusted to 6.5 and filter sterilized.
- 23 H-50 buffer: Recipe was obtained from DictyBase. Briefly, 20 mM HEPES, 1 mM MgSO<sub>4</sub>, 50 mM KCl, 5 mM NaHCO<sub>3</sub>, 10 mM NaCl, and 1 mM NaH<sub>2</sub>PO<sub>4</sub> were added to distilled water. pH was adjusted to 7 and filter sterilized.

### 26 **(C) MCF-10CA1h cells**

- 27 MCF-10CA1h cell line (purchased from the Animal Model and Therapeutic Evaluation Core, Wayne State University)
- 28 10 cm cell culture dish
- 29 0.05% Trypsin-EDTA solution (Gibco #25300054)
- 31 DMEM/F-12 (Gibco #10565042) supplemented with 5% horse serum (Gibco #26050088), 20 ng/ml EGF (Sigma #E9644), 100 ng/ml cholera toxin (Sigma #C-8052), 0.5 mg/ml hydrocortisone (Sigma #H-0888), and 10 µg/ml insulin (Sigma #I-1882)

### 34 **(D) RAW264.7 cells**

- 35 RAW 264.7 mouse monocyte cells (gifted by N. Gautam Lab at WUSTL)
- 36 Cell Scraper (Greiner Bio-One; #541070)
- 37 10 cm cell culture dish
- 38 DMEM (Sigma-Aldrich; #D6429) supplemented with 10% FBS and 1% penicillin-streptomycin

39 **(E) HEK293T cells**

40 HEK293T Human embryonic kidney cell line (purchased from ATCC)

41 DMEM (Gibco #10569-010) supplemented with 10% FBS

42 ***Dictyostelium* Development/ Neutrophil Differentiation System and Reagents**

43 MINIPULS 3 peristaltic pump (Gilson)

44 Innova 2000 platform shaker (New Brunswick)

45 50 ml narrow-mouth Erlenmeyer flask (Pyrex #4980-50)

46 Precision pump tubing, peroxide-cured silicone, L/S 25 (Avantor #MFLX96400-25)

47 cyclic AMP (cAMP; Sigma #A6885)

48 Development buffer (DB)

49 DMSO solution (Sigma #D2650)

50 10 cm cell culture dish

51 **Immunoblotting System**

52 Pre-cast 4-15% polyacrylamide gels (BIO-RAD #5671085)

53 PVDF membranes (BIO-RAD #162-0262)

54 Trans-Blot Turbo semi-dry transfer apparatus (BIO-RAD #1704150EDU)

55 Trans-Blot Turbo Transfer buffer (BIO-RAD #10026938)

56 Blocking buffer: Intercept buffer (Li-Cor #927-60001) mixed with 1x TBS containing 0.1% Tween  
57 20 in equal volumes

58 Anti-mcherry polyclonal antibody (Invitrogen #PA5-34974)

59 Anti-GAPDH polyclonal antibody (Invitrogen #PA1-987)

60 Goat anti-rabbit IRDye 680RD-cojugated secondary antibody (Li-Cor #925-68071)

61 Odyssey CLx imaging system (Li-Cor)

62 **Methods**

63 **Cell Culture**

64 Human neutrophil-like HL-60 cell line was cultured in RPMI medium 1640 supplemented  
65 with 15% heat-inactivated FBS and 1% pen-strep. Cells were subcultured at a seeding density of  
66 0.15 million cells/ml every 3 days<sup>1</sup>. Stable cell lines were grown similarly with selection  
67 antibiotics.

68 MCF-10CA1h cells were grown in supplemented DMEM/F-12 medium in 10 cm culture  
69 dishes. Once they reached 80% confluency, cells were subcultured, post-trypsinization with 0.05%  
70 trypsin, at a ratio of 1:10<sup>2</sup>.

71 RAW 264.7 mouse monocytes were grown in supplemented DMEM medium. At ~90%  
72 confluency, cells were harvested by scraping and passaged at a ratio of 1:4<sup>3</sup>.

73 HEK293T Human embryonic kidney cells were cultured in supplemented DMEM  
74 medium. Cells were grown according to ATCC guidelines.

75 All mammalian cells were grown at 37°C in 5% CO<sub>2</sub>.

76 Wild type *Dictyostelium* (AX2 strain) were cultured at 22°C in HL5 medium supplemented  
77 with 300 µg/mL streptomycin. Cells were passaged either in suspension or on cell culture dishes  
78 every 3-4 days, and experiments were performed within 8-9 weeks of thawing cells from frozen  
79 stocks<sup>4,5</sup>. Stable cell lines were grown similarly with selection antibiotics.

## 80 **Development and differentiation of *Dictyostelium* and neutrophils**

81  
82 For development, vegetative *Dictyostelium* cells were grown to a density of less than  $5 \times 10^6$   
83 cells/ml.  $1 \times 10^8$  cells were harvested, washed twice in 50 ml DB, and resuspended at a  
84 concentration of  $2 \times 10^7$  cells/ml in 5 ml sterile DB. Cell suspension was rotated in a 50 ml narrow-  
85 mouth flask for 1 hour at 100 rpm in RT. Using a peristaltic pump connected with appropriate  
86 tubing, cells were pulsed with 50 nM cAMP every 6 min for the next 5 hours. This allowed cells  
87 to become aggregation-competent and could then be used for migration studies<sup>6</sup>. Stable cell lines  
88 were differentiated similarly.

89 To differentiate HL-60 cells, 1.3% DMSO was introduced in a fresh cell population seeded  
90 at a density of  $1.5 \times 10^5$  cells/ml. Cells along with DMSO were incubated for 5-8 days, before  
91 experimentation. HL-60 is a myeloid leukemia cell line and an effective model to investigate  
92 human neutrophils, upon differentiation<sup>1,7</sup>. Stable cell lines were differentiated similarly in absence  
93 of selection antibiotics.

## 94 **SDS-PAGE and Western blotting**

95 Protein samples equivalent to at least  $5 \times 10^5$  cells were loaded in each well of pre-cast  
96 polyacrylamide gels (4-15%) at 120 V for 1 hour. Next, gels were transferred onto PVDF  
97 membranes for 10 mins using a semi-dry transfer apparatus. Post-transfer, membranes were  
98 incubated in blocking solution for 1 hour. CRY2PHR-mcherry2 expression (~83 kDa) was  
99 detected by incubating membrane with rabbit anti-mcherry polyclonal antibody (1:1000 in  
100 blocking solution) overnight at 4°C. GAPDH (~37 kDa), detected by anti-GAPDH polyclonal  
101 antibody (1:1000 in blocking solution), was used as loading control. After incubation, membranes  
102 were washed five times in TBST for 5 mins each. Next, membranes were probed with goat anti-  
103 rabbit IRDye 680RD-cojugated secondary antibody (1:10,000 dilution in blocking solution) for 1  
104 hour in the dark. Membranes were again washed five times in TBST for 5 mins each. Near-infrared  
105 signal from the membranes was visualized on the Odyssey CLx imaging system.

106

107

108

109

110

111

112

113 **References**

- 114 1. Millius, A., and Weiner, O.D. (2010). Manipulation of neutrophil-like HL-60 cells for the study of  
115 directed cell migration. *Methods Mol Biol* 591, 147-158. 10.1007/978-1-60761-404-3\_9.
- 116 2. Zhan, H., Bhattacharya, S., Cai, H., Iglesias, P.A., Huang, C.H., and Devreotes, P.N. (2020). An  
117 Excitable Ras/PI3K/ERK Signaling Network Controls Migration and Oncogenic Transformation in  
118 Epithelial Cells. *Dev Cell* 54, 608-623 e605. 10.1016/j.devcel.2020.08.001.
- 119 3. Meshik, X., O'Neill, P.R., and Gautam, N. (2018). Optogenetic Control of Cell Migration. *Methods*  
120 *Mol Biol* 1749, 313-324. 10.1007/978-1-4939-7701-7\_22.
- 121 4. Basu, S., Fey, P., Pandit, Y., Dodson, R., Kibbe, W.A., and Chisholm, R.L. (2013). DictyBase 2013:  
122 integrating multiple Dictyostelid species. *Nucleic Acids Res* 41, D676-683. 10.1093/nar/gks1064.
- 123 5. Li, X., Pal, D.S., Biswas, D., Iglesias, P.A., and Devreotes, P.N. (2021). Reverse fountain flow of  
124 phosphatidylinositol-3,4-bisphosphate polarizes migrating cells. *EMBO J* 40, e105094.  
125 10.15252/embj.2020105094.
- 126 6. Artemenko, Y., Swaney, K.F., and Devreotes, P.N. (2011). Assessment of development and  
127 chemotaxis in Dictyostelium discoideum mutants. *Methods Mol Biol* 769, 287-309. 10.1007/978-  
128 1-61779-207-6\_20.
- 129 7. Rincon, E., Rocha-Gregg, B.L., and Collins, S.R. (2018). A map of gene expression in neutrophil-  
130 like cell lines. *BMC Genomics* 19, 573. 10.1186/s12864-018-4957-6.

131
